# Supplementary material for: Impact of Graphene Work Function on the Electronic Structures at the Interface between Graphene and Organic Molecules
Source: MDPI journal article supplement (doi:10.3390/nano9081136), 2019-08-07
Supplement: s1 [file s1]

# Supplementary material

## Impact of graphene work function on the electronic structures at the interface between graphene and organic molecules

HaiTao Wang <sup>1</sup>, XiangDong Yang <sup>1</sup>, WeiDong Dou <sup>2</sup>, Peng Wang <sup>3</sup>, QuanLin Ye <sup>1</sup>, XuXin

Yang <sup>1</sup>, BaoXing Li <sup>1,\*</sup> and HongYing Mao <sup>1,\*</sup>

<sup>1</sup> Department of Physics, Hangzhou Normal University, Hangzhou 310036, China

<sup>2</sup> Laboratory of Low-dimensional Carbon Materials, Physics Department, Shaoxing University, Shaoxing, 312000, China

<sup>3</sup> Department of Applied Physics, College of Electronic and Information Engineering, Shandong University of Science and Technology, Qingdao, 266590, China

\* Correspondence: [phymaohy@hznu.edu.cn](mailto:phymaohy@hznu.edu.cn) (H.M.) and [phybxli@hznu.edu.cn](mailto:phybxli@hznu.edu.cn) (B.L.);

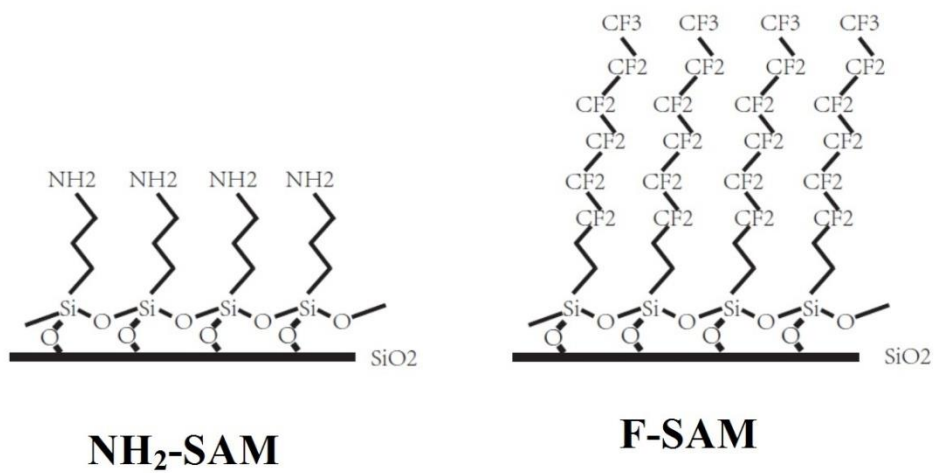

Figure S1 Molecular structures of NH<sub>2</sub>-SAM and F-SAM

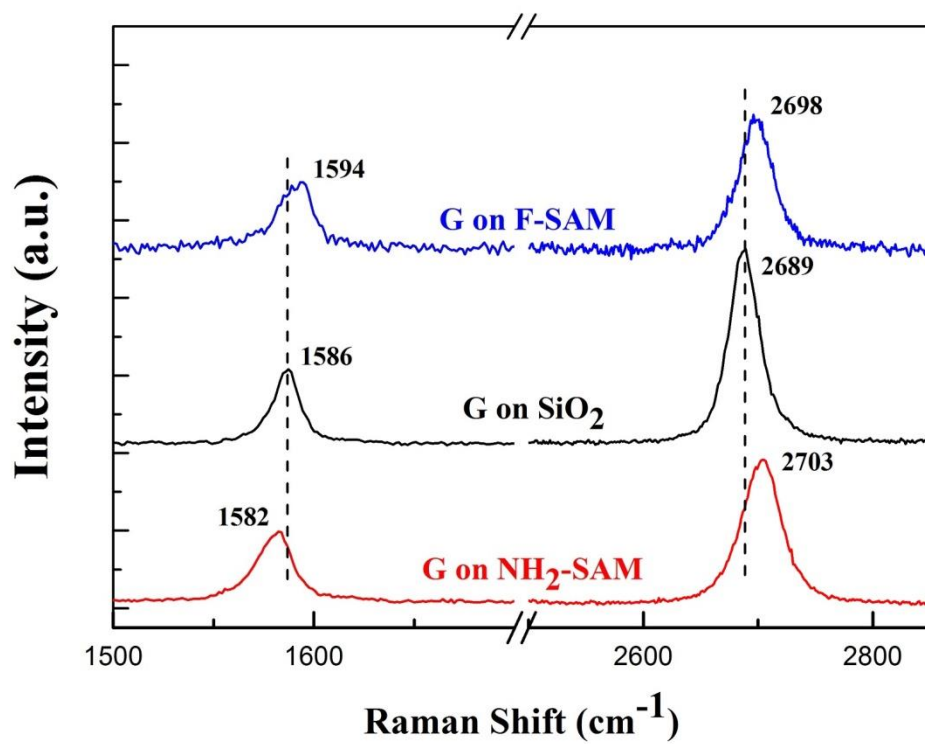

Figure S2. Raman spectra for graphene on NH<sub>2</sub>-SAM, SiO<sub>2</sub>, and F-SAM, respectively.

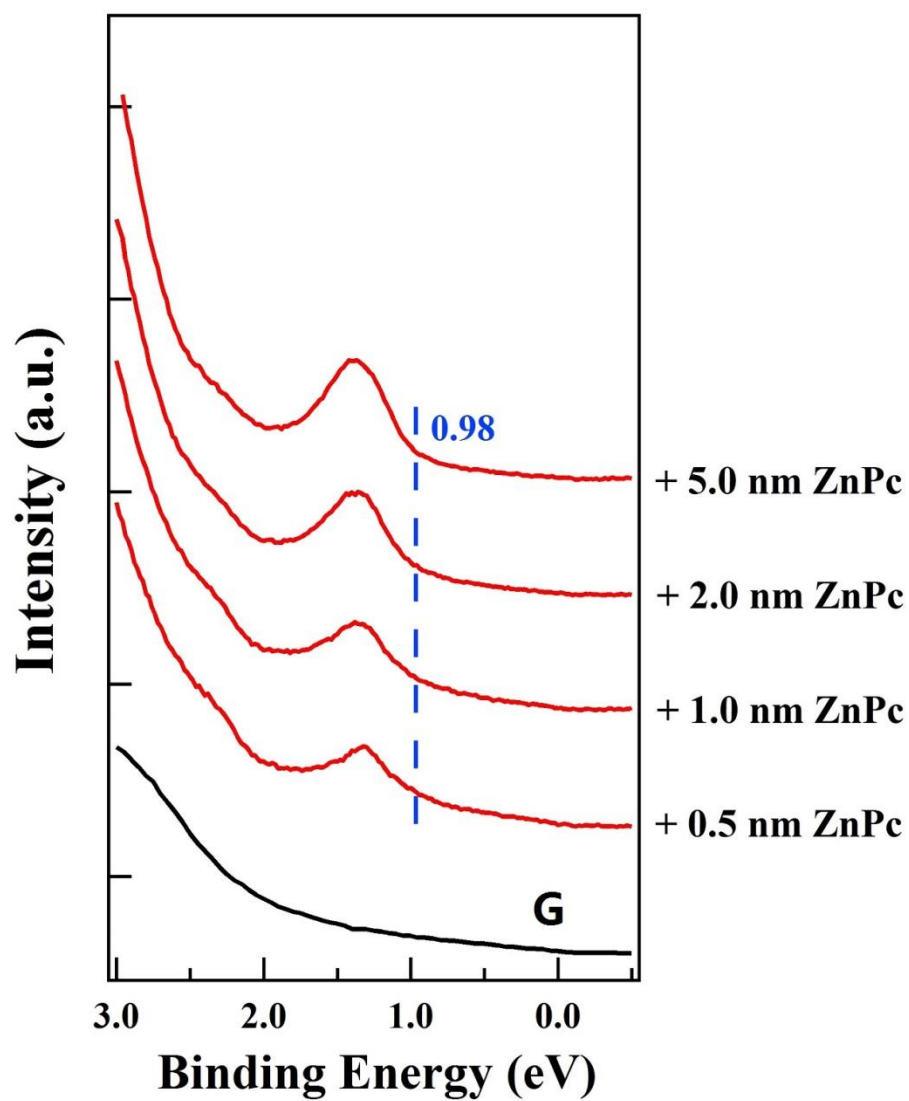

Figure S3. UPS spectra during the sequential deposition of 5.0 nm ZnPc on graphene

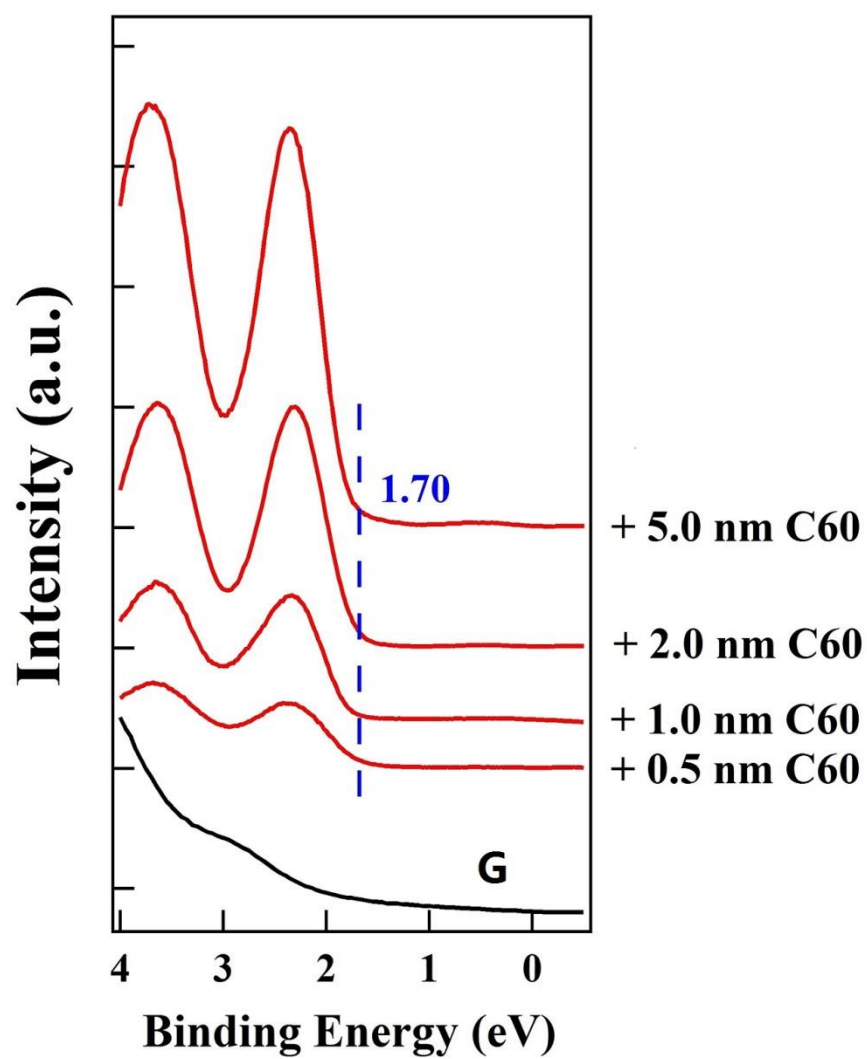

Figure S4. UPS spectra during the sequential deposition of 5.0 nm C<sub>60</sub> on grapheme.
